# Supplementary material for: First Genomic Evidence of a Henipa-like Virus in Brazil
Source: MDPI journal article supplement (doi:10.3390/v14102167), 2022-09-30
Supplement: s1 [file s1]

## Supplementary Figure

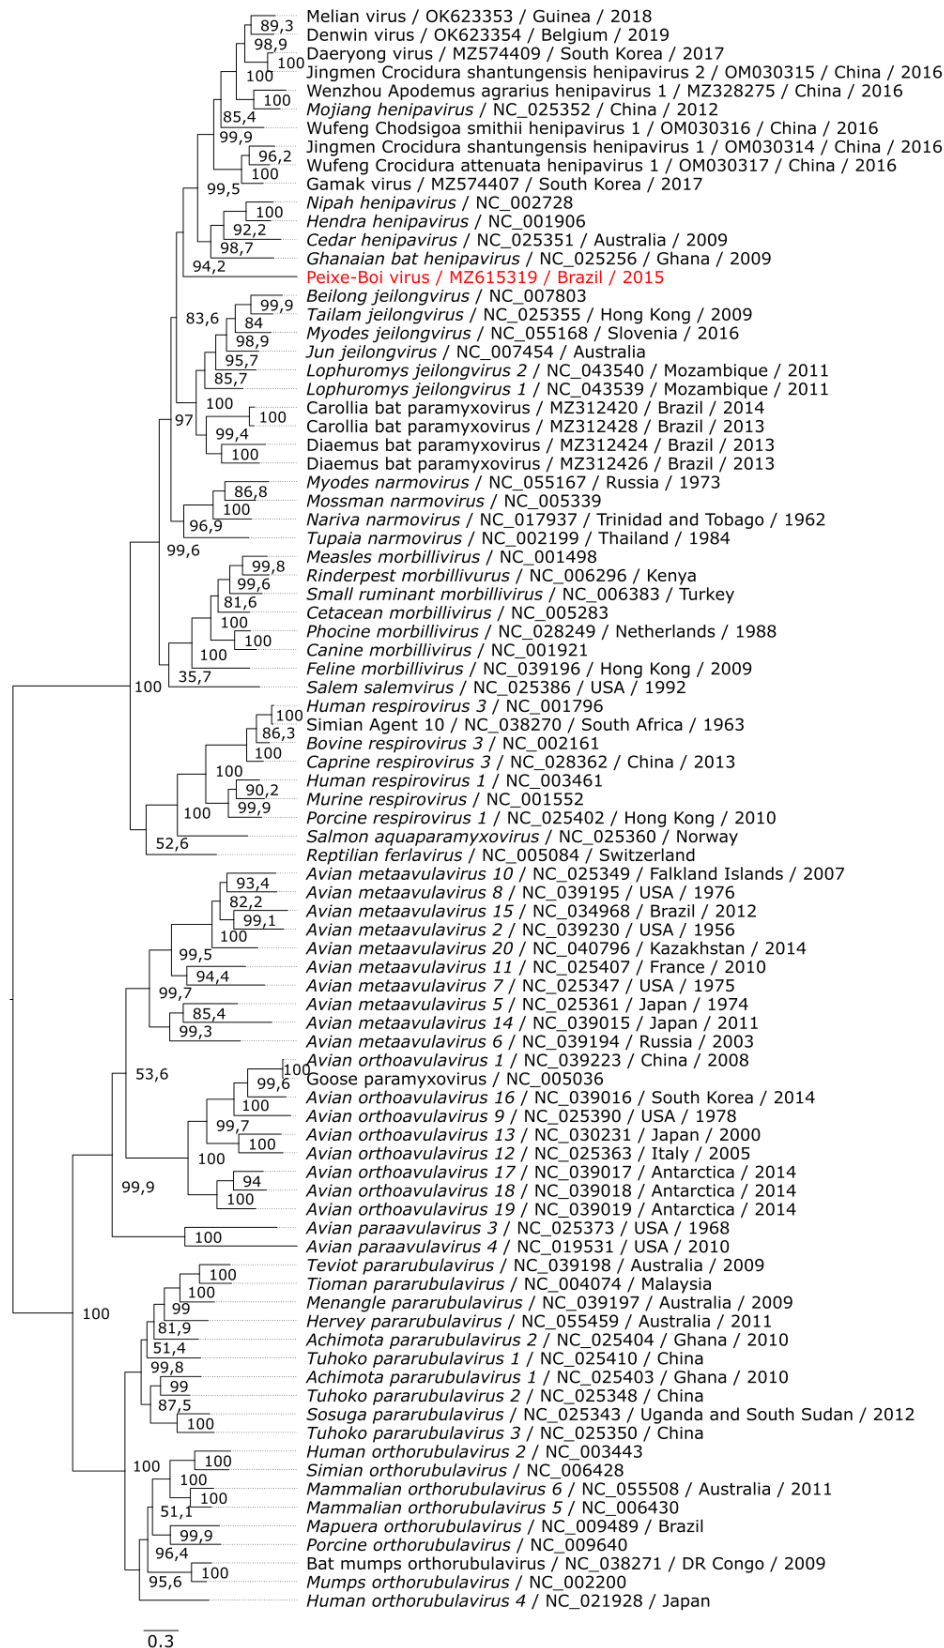

**Figure S1.** Phylogenetic tree based on the partial nucleotide *Paramyxoviridae* L gene sequences, novel rodent and shrew-borne henipaviruses, Brazilian jeilongviruses, and PBV (in red) sequences. Each record consists of the virus species/name, accession number, country and year of detection/isolation.
