# Supplementary material for: First Genomic Evidence of a Henipa-like Virus in Brazil
Source: Viruses. 2022 Sep 30;14(10):2167. doi: 10.3390/v14102167 (PMC9608811; doi:10.3390/v14102167)
Supplement: Supplementary file 1 [file viruses-14-02167-s001.zip › Supplementary Tables.xlsx]

## Sheet: Table S1
		Table S1: Description of Marmosa demerarae mitochondrial genes.
		Abbreviation	Gene	Sense	Position
		rRNA12s	12S ribosomal RNA	Forward	0070-1023
		rRNA16s	16S ribosomal RNA	Forward	1094-2666
		ND1	NAD 1	Forward	2742-3697
		ND2	NAD 2	Forward	3903-4943
		COI	Cytochrome c oxidase I	Forward	5398-6939
		COII	Cytochrome c oxidase II	Forward	7084-7768
		ATP8	ATP synthase 8	Forward	7830-8039
		ATP6	ATP synthase 6	Forward	7994-8674
		COIII	Cytochrome c oxidase III	Forward	8671-9457
		ND3	NAD 3	Forward	9526-9871
		ND4L	NAD 4L	Forward	9942-10238
		ND4	NAD 4	Forward	10232-11609
		ND5	NAD 5	Forward	11807-13609
		ND6	NAD 6	Reverse	14110-13610
		CytB	Cytochrome b	Forward	14182-15330
		F	Phenylalanine	Forward	0001-0069
		V	Valine	Forward	1024-1093
		L2	Leucine	Forward	2667-2740
		I	Isoleucine	Forward	3698-3766
		Q	Glutamine	Reverse	3834-3764
		M	Methionine	Forward	3834-3902
		A	Alanine	Reverse	5012-4944
		C	Cysteine	Reverse	5098-5030
		W	Tryptophan	Forward	5107-5177
		N	Asparagine	Reverse	5327-5256
		Y	Tyrosine	Reverse	5396-5329
		S2	Serine	Reverse	7011-6943
		D	Aspartate	Forward	7014-7082
		K	Lysine	Forward	7769-7824
		G	Glycine	Forward	9458-9525
		R	Arginine	Forward	9872-9941
		H	Histidine	Forward	11610-11678
		S1	Serine	Forward	11679-11736
		L1	Leucine	Forward	11736-11806
		E	Glutamate	Reverse	14179-14111
		T	Threonine	Forward	15333-15401
		P	Proline	Reverse	15469-15404

## Sheet: Table S2
		Table S2: Genomes included in the multiple alignment and phylogenetic analysis.
		Subfamily	Genus	Species / Virus name	Host	Country	Year	Accession no.
		Orthoparamyxovirinae	Henipavirus	Melian virus	Crocidura grandiceps	Guinea	2018	OK623353
				Denwin virus	Crocidura russula	Belgium	2019	OK623354
				Daeryong virus	Crocidura shantungensis	South Korea	2017	MZ574409
				Jingmen Crocidura shantungensis henipavirus 2	Crocidura shantungensis	China	2016	OM030315
				Wenzhou Apodemus agrarius henipavirus 1	Apodemus agrarius	China	2016	MZ328275
				Mojiang henipavirus	Rattus rattus sladeni	China	2012	NC_025352
				Wufeng Chodsigoa smithii henipavirus 1	Chodsigoa smithii	China	2016	OM030316
				Jingmen Crocidura shantungensis henipavirus 1	Crocidura shantungensis	China	2016	OM030314
				Wufeng Crocidura attenuata henipavirus 1	Crocidura attenuata	China	2016	OM030317
				Gamak virus	Crocidura lasiura	South Korea	2017	MZ574407
				Nipah henipavirus	-	-	-	NC_002728
				Hendra henipavirus	-	-	-	NC_001906
				Cedar henipavirus	Pteropus sp.	Australia	2009	NC_025351
				Ghanaian bat henipavirus	Eidolon helvum	Ghana	2009	NC_025256
				Peixe-Boi virus	Marmosa demerarae	Brazil	2015	MZ615319
			Jeilongvirus	Beilong jeilongvirus	-	-	-	NC_007803
				Tailam jeilongvirus	Rattus andamanensis	Hong Kong	2009	NC_025355
				Myodes jeilongvirus	Myodes glareolus	Slovenia	2016	NC_055168
				Jun jeilongvirus	Mus musculus	Australia	-	NC_007454
				Lophuromys jeilongvirus 2	Lophuromys machangui	Mozambique	2011	NC_043540
				Lophuromys jeilongvirus 1	Lophuromys machangui	Mozambique	2011	NC_043539
				Carollia bat paramyxovirus PDF-3308	Carollia perspicillata	Brazil	2014	MZ312420
				Carollia bat paramyxovirus PBZ-1672	Carollia perspicillata	Brazil	2013	MZ312428
				Diaemus bat paramyxovirus PBZ-3205	Diaemus youngi	Brazil	2013	MZ312424
				Diaemus bat paramyxovirus PBZ-2282	Diaemus youngi	Brazil	2013	MZ312426
			Narmovirus	Myodes narmovirus	Myodes glareolus	Russia	1973	NC_055167
				Mossman narmovirus	Wild rat	-	-	NC_005339
				Nariva narmovirus	Zygodontomys brevicauda	Trinidad and Tobago	1962	NC_017937
				Tupaia narmovirus	Tupaia belangeri	Thailand	1984	NC_002199
			Morbillivirus	Measles morbillivirus	-	-	-	NC_001498
				Rinderpest morbillivirus	Cattle	Kenya	-	NC_006296
				Small ruminant morbillivirus	Ovis aries	Turkey	-	NC_006383
				Cetacean morbillivirus	-	-	-	NC_005283
				Phocine morbillivirus	Phoca vitulina	Netherlands	1988	NC_028249
				Canine morbillivirus	-	-	-	NC_001921
				Feline morbillivirus	Felis catus	Hong Kong	2009	NC_039196
			Salemvirus	Salem salemvirus	Horse	USA	1992	NC_025386
			Respirovirus	Caprine respirovirus 3	Goat	China	2013	NC_028362
				Bovine respirovirus 3	-	-	-	NC_002161
				Human respirovirus 3	-	-	-	NC_001796
				Simian Agent 10	Cercopithecus mitis	South Africa	1963	NC_038270
				Human respirovirus 1	-	-	-	NC_003461
				Murine respirovirus	-	-	-	NC_001552
				Porcine respirovirus 1	Sus scrofa domesticus	Hong Kong	2010	NC_025402
			Aquaparamyxovirus	Salmon aquaparamyxovirus	-	-	-	NC_025360
			Ferlavirus	Reptilian ferlavirus	Bothrops atrox	Switzerland	-	NC_005084
		Avulavirinae	Metaavulavirus	Avian metaavulavirus 10	Eudyptes chrysocome	Falkland Islands	2007	NC_025349
				Avian metaavulavirus 8	Branta canadensis	USA	1976	NC_039195
				Avian metaavulavirus 15	Calidris fuscicollis	Brazil	2012	NC_034968
				Avian metaavulavirus 2	Chicken	USA	1956	NC_039230
				Avian metaavulavirus 20	Gull	Kazakhstan	2014	NC_040796
				Avian metaavulavirus 11	Gallinago gallinago	France	2010	NC_025407
				Avian metaavulavirus 7	Columba sp.	USA	1975	NC_025347
				Avian metaavulavirus 5	Melopsittacus undulatus	Japan	1974	NC_025361
				Avian metaavulavirus 14	Duck	Japan	2011	NC_039015
				Avian metaavulavirus 6	Domestic goose	Russia	2003	NC_039194
			Paraavulavirus	Avian paraavulavirus 3	Turkey	USA	1968	NC_025373
				Avian paraavulavirus 4	Anas rubripes	USA	2010	NC_019531
			Orthoavulavirus	Avian orthoavulavirus 1	Laying duck	China	2008	NC_039223
				Goose paramyxovirus	-	-	-	NC_005036
				Avian orthoavulavirus 16	Wild duck	South Korea	2014	NC_039016
				Avian orthoavulavirus 9	Anas platyrhynchos domesticus	USA	1978	NC_025390
				Avian orthoavulavirus 13	Anser sp.	Japan	2000	NC_030231
				Avian orthoavulavirus 12	Anas penelope	Italy	2005	NC_025363
				Avian orthoavulavirus 17	Pygoscelis papua	Antarctica	2014	NC_039017
				Avian orthoavulavirus 18	Pygoscelis papua	Antarctica	2014	NC_039018
				Avian orthoavulavirus 19	Pygoscelis papua	Antarctica	2014	NC_039019
		Rubulavirinae	Pararubulavirus	Teviot pararubulavirus	Pteropus sp.	Australia	2009	NC_039198
				Tioman pararubulavirus	Pteropus hypomelanus	Malaysia	-	NC_004074
				Menangle pararubulavirus	Pteropus alecto	Australia	2009	NC_039197
				Hervey pararubulavirus	Pteropus sp.	Australia	2011	NC_055459
				Achimota pararubulavirus 2	Eidolon helvum	Ghana	2010	NC_025404
				Achimota pararubulavirus 1	Eidolon helvum	Ghana	2010	NC_025403
				Tuhoko pararubulavirus 2	Rousettus leschenaultii	China	-	NC_025348
				Sosuga pararubulavirus	Homo sapiens	Uganda and South Sudan	2012	NC_025343
				Tuhoko pararubulavirus 3	Rousettus leschenaultii	China	-	NC_025350
				Tuhoko pararubulavirus 1	Rousettus leschenaultii	China	-	NC_025410
			Orthorubulavirus	Mapuera orthorubulavirus	Sturnira lilium	Brazil	-	NC_009489
				Porcine orthorubulavirus	-	-	-	NC_009640
				Human orthorubulavirus 4	-	Japan	-	NC_021928
				Bat mumps orthorubulavirus	Epomophorus sp.	DR Congo	2009	NC_038271
				Mumps orthorubulavirus	-	-	-	NC_002200
				Human orthorubulavirus 2	-	-	-	NC_003443
				Simian orthorubulavirus	-	-	-	NC_006428
				Mammalian orthorubulavirus 6	Pteropus sp.	Australia	2011	NC_055508
				Mammalian orthorubulavirus 5	-	-	-	NC_006430
